# Supplementary material for: Human-Origin Influenza A(H3N2) Reassortant Viruses in Swine, Southeast Mexico
Source: PubMed Central journal article supplement (PMC6433011; doi:10.3201/eid2504.180779), 2019-04
Supplement: 18-0779-Techapp-s1.pdf [file 18-0779-Techapp-s1.pdf]

# Human-Origin Influenza A(H3N2) Reassortant Viruses in Swine, Southeast Mexico

## Appendix

**Appendix Table 1.** Characteristics of 59 influenza viruses sequenced for this analysis, southeast Mexico\*

| Virus name                           | Date of isolation | Location  |     |     |    | HA          | H1       | NP | NA         | MP    | NS | Genotype |
|--------------------------------------|-------------------|-----------|-----|-----|----|-------------|----------|----|------------|-------|----|----------|
|                                      |                   | in Mexico | PB2 | PB1 | PA |             |          |    |            |       |    |          |
| A/Swine/Mexico/9684432/2013/Mixed    | 2013 Feb 25       | SE        | P   | P   | P  | H3 (human)  |          | P  | mixed      | P     | P  | 15       |
| A/Swine/Mexico/9783514/2013/Mixed    | 2013 Apr 15       | SE        | P   | P   | P  | H3 (human)  |          | P  | mixed      | P     | P  | 15       |
| A/Swine/Mexico/9557133/2013/H1N1     | 2013 Jan 2        | SE        | T   | T   | T  | H1c (gamma) | 1A.3.1   | T  | N1e        | MP-e  | T  | 8        |
| A/Swine/Mexico/9762101/2013/H1N1     | 2013 Apr 6        | SE        | T   | T   | T  | H1c (gamma) | 1A.3.1   | T  | N1e        | MP-e  | T  | 8        |
| A/Swine/Mexico/9783445/2013/H1N1     | 2013 Apr 15       | SE        | T   | T   | T  | H1c (gamma) | 1A.3.1   | T  | N1e        | MP-e  | T  | 8        |
| A/Swine/Mexico/9800323/2013/H1N1     | 2013 Apr 22       | SE        | T   | T   | T  | H1c (gamma) | 1A.3.1   | T  | N1e        | MP-e  | T  | 8        |
| A/Swine/Mexico/9453312/2012/H3N2     | 2012 Oct 29       | SE        | P   | P   | P  | H3 (human)  |          | P  | N2 (human) | P     | P  | 14       |
| A/Swine/Mexico/9634750/2013/H3N2     | 2103 Jan 31       | SE        | P   | P   | P  | H3 (human)  |          | P  | N2 (human) | P     | P  | 14       |
| A/Swine/Mexico/9714185/2013/H3N2     | 2013 Mar 14       | SE        | P   | P   | P  | H3 (human)  |          | P  | N2 (human) | P     | P  | 14       |
| A/Swine/Mexico/9741876/2013/H3N2     | 2013 Mar 28       | SE        | P   | P   | P  | H3 (human)  |          | P  | N2 (human) | P     | P  | 14       |
| A/Swine/Mexico/9857788/2013/H3N2     | 2013 May 20       | SE        | P   | P   | P  | H3 (human)  |          | P  | N2 (human) | P     | P  | 14       |
| A/Swine/Mexico/84706352130/2015/H3N2 | 2015 Jun 9        | SE        | P   | P   | P  | H3 (human)  |          | P  | N2 (human) | P     | P  | 14       |
| A/Swine/Mexico/10032432/2013/H1N2    | 2013 Aug 16       | SE        | P   | P   | P  | P           | 1A.3.3.2 | P  | N2 (human) | P     | P  | 13       |
| A/Swine/Mexico/10290795/2014/H1N2    | 2013 Dec 22       | SE        | P   | P   | P  | P           | 1A.3.3.2 | P  | N2 (human) | P     | P  | 13       |
| A/Swine/Mexico/10912920/2014/H1N1    | 2014 Nov 5        | SE        | P   | P   | P  | P           | 1A.3.3.2 | P  | N2 (human) | P     | P  | 13       |
| A/Swine/Mexico/10926242/2014/H1N2    | 2014 Nov 12       | SE        | P   | P   | P  | P           | 1A.3.3.2 | P  | N2 (human) | P     | P  | 13       |
| A/Swine/Mexico/84703289210/2015/H1N2 | 2015 Mar 25       | SE        | P   | P   | P  | P           | 1A.3.3.2 | P  | N2 (human) | P     | P  | 13       |
| A/Swine/Mexico/9711817/2013/H1N2     | 2103 Mar 11       | SE        | P   | P   | P  | P           | 1A.3.3.2 | P  | N2 (human) | P     | P  | 13       |
| A/Swine/Mexico/9800379/2013/H1N2     | 2013 Apr 22       | SE        | P   | P   | P  | P           | 1A.3.3.2 | P  | N2 (human) | P     | P  | 13       |
| A/Swine/Mexico/9562931/2013/H3N2     | 2102 Dec 23       | SE        | T   | T   | T  | H3 (swine)  |          | T  | N2 (swine) | MP-e  | T  | 6        |
| A/Swine/Mexico/9783350/2013/H3N2     | 2013 Apr 15       | SE        | T   | T   | T  | H3 (swine)  |          | T  | N2 (swine) | MP-e  | T  | 6        |
| A/Swine/Mexico/9199572/2012/H1N1     | 2102 Jun 28       | SE        | P   | P   | P  | P           | 1A.3.3.2 | P  | P          | Mixed | P  | 11       |
| A/Swine/Mexico/9922474/2013/H1N1     | 2013 Jun 22       | SE        | P   | P   | P  | P           | 1A.3.3.2 | P  | P          | P     | P  | 12       |
| A/Swine/Mexico/10126158/2013/H1N1    | 2013 Sep 30       | SE        | P   | P   | P  | P           | 1A.3.3.2 | P  | P          | P     | P  | 12       |
| A/Swine/Mexico/10248405/2013/H1N1    | 2013 Dec 1        | SE        | P   | P   | P  | P           | 1A.3.3.2 | P  | P          | P     | P  | 12       |
| A/Swine/Mexico/10433030/2014/H1N1    | 2014 Mar 1        | SE        | P   | P   | P  | P           | 1A.3.3.2 | P  | P          | P     | P  | 12       |
| A/Swine/Mexico/10466772/2014/H1N1    | 2014 Mar 16       | SE        | P   | P   | P  | P           | 1A.3.3.2 | P  | P          | P     | P  | 12       |
| A/Swine/Mexico/84704755140/2014/H1N1 | 2014 Aug 28       | SE        | P   | P   | P  | P           | 1A.3.3.2 | P  | P          | P     | P  | 12       |
| A/Swine/Mexico/10969586/2014/H1N1    | 2014 Dec 4        | SE        | P   | P   | P  | P           | 1A.3.3.2 | P  | P          | P     | P  | 12       |
| A/Swine/Mexico/9213802/2012/H1N1     | 2012 Jul 5        | SE        | P   | P   | P  | P           | 1A.3.3.2 | P  | P          | P     | P  | 12       |
| A/Swine/Mexico/9425974/2012/H1N1     | 2012 Oct 14       | SE        | P   | P   | P  | P           | 1A.3.3.2 | P  | P          | P     | P  | 12       |

| Virus name                            | Date of isolation | Location  |     |     |    |            |          |    |            |       |    |    | Genotype |
|---------------------------------------|-------------------|-----------|-----|-----|----|------------|----------|----|------------|-------|----|----|----------|
|                                       |                   | in Mexico | PB2 | PB1 | PA | HA         | H1       | NP | NA         | MP    | NS |    |          |
| A/Swine/Mexico/9713846/2013/H1N1      | 2013 Mar 14       | SE        | P   | P   | P  | P          | 1A.3.3.2 | P  | P          | P     | P  | 12 |          |
| A/Swine/Mexico/9722783/2013/H1N1      | 2013 Mar 17       | SE        | P   | P   | P  | P          | 1A.3.3.2 | P  | P          | P     | P  | 12 |          |
| A/Swine/Mexico/9741916/2013/H1N1      | 2013 Mar 28       | SE        | P   | P   | P  | P          | 1A.3.3.2 | P  | P          | P     | P  | 12 |          |
| A/Swine/Mexico/9800385/2013/H1N1      | 2013 Apr 22       | SE        | P   | P   | P  | P          | 1A.3.3.2 | P  | P          | P     | P  | 12 |          |
| A/Swine/Mexico/9800380/2013/H1N1      | 2013 Apr 22       | SE        | P   | P   | P  | P          | 1A.3.3.2 | P  | P          | P     | P  | 12 |          |
| A/Swine/Mexico/9800390/2013/H1N1      | 2013 Apr 22       | SE        | P   | P   | P  | P          | 1A.3.3.2 | P  | P          | P     | P  | 12 |          |
| A/Swine/Mexico/8935602/2012/H1N1      | 2012 Feb 23       | NW        | T   | T   | T  | H1c (β)    | 1A.2     | P  | N1c        | Mixed | T  | 7  |          |
| A/Swine/Mexico/10499819/2014/H3N2     | 2014 Apr 3        | NW        | P   | P   | P  | H3 (swine) |          | P  | N2 (swine) | P     | P  | 1  |          |
| A/Swine/Mexico/847061253020/2014/H3N2 | 2014 Apr 28       | NW        | P   | P   | P  | H3 (swine) |          | P  | N2 (swine) | P     | P  | 1  |          |
| A/Swine/Mexico/847071253020/2014/H3N2 | 2014 Apr 28       | NW        | P   | P   | P  | H3 (swine) |          | P  | N2 (swine) | P     | P  | 1  |          |
| A/Swine/Mexico/10598944/2014/H3N2     | 2014 Jun 13       | NW        | P   | P   | P  | H3 (swine) |          | P  | N2 (swine) | P     | P  | 1  |          |
| A/Swine/Mexico/7932475/2010/H3N2      | 2010 Nov 4        | NW        | P   | P   | P  | H3 (swine) |          | T  | N2 (swine) | Mixed | T  | 2  |          |
| A/Swine/Mexico/8630588/2011/H3N2      | 2011 Sep 26       | NW        | P   | P   | P  | H3 (swine) |          | T  | N2 (swine) | Mixed | T  | 2  |          |
| A/Swine/Mexico/8630565/2011/H3N2      | 2011 Sep 26       | NW        | P   | P   | P  | H3 (swine) |          | T  | N2 (swine) | P     | T  | 3  |          |
| A/Swine/Mexico/8630638/2011/H3N2      | 2011 Sep 26       | NW        | P   | P   | P  | H3 (swine) |          | T  | N2 (swine) | P     | T  | 3  |          |
| A/Swine/Mexico/9890611/2013/H3N2      | 2013 Jun 6        | NW        | P   | P   | P  | H3 (swine) |          | T  | N2 (swine) | P     | T  | 3  |          |
| A/Swine/Mexico/8630459/2011/H3N2      | 2011 Sep 26       | NW        | T   | T   | P  | H3 (swine) |          | T  | N2 (swine) | Mixed | P  | 4  |          |
| A/Swine/Mexico/7773583/2010/H3N2      | 2010 Aug 22       | NW        | T   | T   | T  | H3 (swine) |          | T  | N2 (swine) | MPc   | T  | 5  |          |
| A/Swine/Mexico/11004418/2014/H1N2     | 2014 Dec 22       | NW        | P   | P   | P  | P          | 1A.3.3.2 | P  | N2 (swine) | P     | P  | 10 |          |
| A/Swine/Mexico/8630529/2011/H1N1      | 2011 Sep 26       | NW        | P   | P   | P  | P          | 1A.3.3.2 | P  | P          | P     | T  | 9  |          |
| A/Swine/Mexico/84703178820/2014/H1N1  | 2014 Jun 13       | NW        | P   | P   | P  | P          | 1A.3.3.2 | P  | P          | P     | T  | 9  |          |
| A/Swine/Mexico/84703857030/2014/H1N1  | 2014 Jun 25       | NW        | P   | P   | P  | P          | 1A.3.3.2 | P  | P          | P     | T  | 9  |          |
| A/Swine/Mexico/847011987050/2014/H1N1 | 2014 Oct 23       | NW        | P   | P   | P  | P          | 1A.3.3.2 | P  | P          | P     | T  | 9  |          |
| A/Swine/Mexico/847021987050/2014/H1N1 | 2014 Oct 23       | NW        | P   | P   | P  | P          | 1A.3.3.2 | P  | P          | P     | T  | 9  |          |
| A/Swine/Mexico/7774063/2010/H1N1      | 2010 Aug 22       | NW        | P   | P   | P  | P          | 1A.3.3.2 | P  | P          | Mixed | P  | 11 |          |
| A/Swine/Mexico/7942103/2010/H1N1      | 2010 Nov 7        | NW        | P   | P   | P  | P          | 1A.3.3.2 | P  | P          | Mixed | P  | 11 |          |
| A/Swine/Mexico/8630550/2011/H1N1      | 2011 Sep 26       | NW        | P   | P   | P  | P          | 1A.3.3.2 | P  | P          | Mixed | P  | 11 |          |
| A/Swine/Mexico/9583196/2013/H1N1      | 2013 Jan 4        | NW        | P   | P   | P  | P          | 1A.3.3.2 | P  | P          | P     | P  | 12 |          |

\*Genotypes refer to those listed in Figure 2. HA, hemagglutinin; MP, matrix protein; NA, neuraminidase; NP, nucleoprotein; NS, nonstructural; NW, northwest; PA, polymerase acidic; PB, polymerase basic; SE, southeast; SW, southwest.

**Appendix Table 2.** Times to the most recent common ancestor for introduction of influenza viruses into southeast Mexico\*

| Characteristic | Genotype                                                       |                                                                                                                                  |                              |                                                                                                                                                                                                                                                                                                    |
|----------------|----------------------------------------------------------------|----------------------------------------------------------------------------------------------------------------------------------|------------------------------|----------------------------------------------------------------------------------------------------------------------------------------------------------------------------------------------------------------------------------------------------------------------------------------------------|
|                | 6                                                              | 8                                                                                                                                | 6                            | 14 + 15                                                                                                                                                                                                                                                                                            |
| Viruses        | A/sw/Mexico/9562931/2013/H3N2<br>A/sw/Mexico/9783350/2013/H3N2 | A/sw/Mexico/9783445/2013/H1N1<br>A/sw/Mexico/9762101/2013/H1N1<br>A/sw/Mexico/9800323/2013/H1N1<br>A/sw/Mexico/9557133/2013/H1N1 | A/sw/Mexico/AVX-57/2013/H3N2 | A/Swine/Mexico/84706352130/2015/H3N2<br>A/Swine/Mexico/9453312/2012/H3N2<br>A/Swine/Mexico/9714185/2013/H3N2<br>A/Swine/Mexico/9741876/2013/H3N2<br>A/Swine/Mexico/9857788/2013/H3N2<br>A/Swine/Mexico/9634750/2013/H3N2<br>A/Swine/Mexico/9684432/2013/Mixed<br>A/Swine/Mexico/9783514/2013/Mixed |
| Origin         | Central Mexico                                                 | Central Mexico                                                                                                                   | Central Mexico               | Humans                                                                                                                                                                                                                                                                                             |
| Destination    | East Mexico                                                    | East Mexico                                                                                                                      | East Mexico                  | East Mexico                                                                                                                                                                                                                                                                                        |
| PB2-t          | 2011.1–2012.79                                                 | 2012.5–2012.8                                                                                                                    |                              |                                                                                                                                                                                                                                                                                                    |
| PB1-t          | 2012.22–2012.9                                                 | 2011.06–2012.69                                                                                                                  |                              |                                                                                                                                                                                                                                                                                                    |
| PA-t           | 2010.73–2012.64                                                | 2011.28–2012.26                                                                                                                  |                              |                                                                                                                                                                                                                                                                                                    |
| H1c            |                                                                | 2011.23–2012.76                                                                                                                  |                              |                                                                                                                                                                                                                                                                                                    |
| H3             |                                                                | 2011.25–2012.85                                                                                                                  | 2012.12–2013.47              | 1994.32–2010.55                                                                                                                                                                                                                                                                                    |
| NP-t           | 2011.48–2012.64                                                | 2012.06–2012.85                                                                                                                  |                              | 2012.0–2013.47                                                                                                                                                                                                                                                                                     |
| N1-e           |                                                                |                                                                                                                                  | 2011.06–2012.71              |                                                                                                                                                                                                                                                                                                    |
| N2             |                                                                | 2009.95–2012.98                                                                                                                  | 2011.55–2013.47              | 1994.55–2009.7                                                                                                                                                                                                                                                                                     |
| MP-e           | 2011.85–2012.69                                                | 2012.35–2012.7                                                                                                                   |                              | 2011.98–2013.47                                                                                                                                                                                                                                                                                    |
| NS-t           | 2011.29–2012.42                                                | 2011.73–2012.46                                                                                                                  |                              | 2011.76–2013.47                                                                                                                                                                                                                                                                                    |
| Average        | 2011.23–2012.74                                                | 2011.66–2012.65                                                                                                                  | 2011.92–2013.47              | 1994.43–2010.12                                                                                                                                                                                                                                                                                    |

\*H, hemagglutinin; MP, matrix protein; NA, neuraminidase; NP, nucleoprotein; NS, nonstructural; NW, northwest; PA, polymerase acidic; PB, polymerase basic.

**Appendix Table 3.** Influenza virus strains used in antigenic analysis of influenza virus, southeast Mexico\*

| GenBank accession no. | Strain                       | Country | Antigenic map strains reference |
|-----------------------|------------------------------|---------|---------------------------------|
| KM821302              | A/Wuhan/359/1995†            | China   | Wu/95                           |
| CY095675              | A/swine/TX/4199–2/1998       | USA     | TX/98                           |
| EU735818              | A/turkey/OH/313053/2004      | USA     | OH/04                           |
| CY099103.1            | A/swine/MN/02782/2009        | USA     | MN/09                           |
| JN940422.1            | A/swine/NY/A01104005/2011    | USA     | NY/11                           |
| KJ635928.1            | A/swine/IA/A01480656/2014    | USA     | IA/14                           |
| KU976701.1            | A/swine/Mex/AVX26/2012       | Mexico  | 1                               |
| KU976600.1            | A/swine/Mex/AVX36/2012       | Mexico  | 2                               |
| KU976665.1            | A/swine/Mex/AVX53/2013       | Mexico  | 3                               |
| KU976721.1            | A/swine/Mex/AVX57/2013       | Mexico  | 4                               |
| KR870290.1            | A/swine/Mex/9857788/2013     | Mexico  | 5                               |
| MG836811.1            | A/swine/Mex/84706352130/2015 | Mexico  | 6                               |
| KR870257.1            | A/swine/Mex/8630565/2011     | Mexico  | 7                               |
| KR870254.1            | A/swine/Mex/8630459/2011     | Mexico  | 8                               |
| KU976510.1            | A/swine/Mex/AVX15/2012       | Mexico  | 9                               |
| KR870291.1            | A/swine/Mex/9890611/2013     | Mexico  | 10                              |

\*Includes 5 strains isolated from swine in Mexico, as reported by Mena et al. (7) and indicated by the abbreviation AVX.

†Influenza A(H3N2) human seasonal vaccine virus strain.

**Appendix Table 4.** Hemagglutination titers between viruses from Mexico and reference strains from swine and humans in the United States\*

| Antigen                               | Virus type              | A(H3N2)/<br>/Wuhan/<br>359/1995 | A(H3N2)/<br>/Wuhan/<br>359/<br>1995 | A(H3N2)/<br>/swine/<br>Texas/<br>4199–1/<br>1998 | A(H3N2)/<br>/swine/<br>Texas/<br>4199–1/<br>1998 | A(H3N2)/<br>/turkey/<br>Ohio/<br>313053/<br>2004 | A(H3N2)/<br>/turkey/<br>Ohio/<br>313053/<br>2004 | A(H3N2)/<br>/swine/<br>Minnesota/<br>02782/<br>2009 | A(H3N2)/<br>/swine/<br>Minnesota/<br>02782/<br>2009 | A(H3N2)/<br>swine/<br>New<br>York/<br>A011040<br>05/2011 | A(H3N2)/<br>swine/<br>New<br>York/<br>A011040<br>05/ 2011 | A(H3N2)/<br>/swine/<br>Iowa/<br>A014806<br>56/2014 | A(H3N2)/<br>/swine/<br>Iowa/<br>A014806<br>56/2014 |
|---------------------------------------|-------------------------|---------------------------------|-------------------------------------|--------------------------------------------------|--------------------------------------------------|--------------------------------------------------|--------------------------------------------------|-----------------------------------------------------|-----------------------------------------------------|----------------------------------------------------------|-----------------------------------------------------------|----------------------------------------------------|----------------------------------------------------|
| A(H3N2)/Wuhan/359/1995                | Human vaccine Cluster I | 640                             | 640                                 | 640                                              | 640                                              | 80                                               | 40                                               | –                                                   | –                                                   | 80                                                       | 80                                                        | 80                                                 | 160                                                |
| A(H3N2)/swine/Texas/4199–1/1998       | Cluster I               | 160                             | 320                                 | 2,560                                            | 1,280                                            | 40                                               | 20                                               | 320                                                 | 320                                                 | 20                                                       | 40                                                        | 40                                                 | 80                                                 |
| A(H3N2)/turkey/Ohio/313053/2004       | Cluster IV              | 10                              | 20                                  | 40                                               | 20                                               | 640                                              | 640                                              | –                                                   | –                                                   | 320                                                      | 160                                                       | 20                                                 | 20                                                 |
| A(H3N2)/swine/Minnesota/02782/2009    | Cluster IV              | <10                             | 20                                  | 80                                               | 40                                               | –                                                | –                                                | 5,120                                               | 2,560                                               | 320                                                      | 640                                                       | 40                                                 | 20                                                 |
| A(H3N2)/swine/New York/A01104005/2011 | Cluster IV-A            | 20                              | 20                                  | 320                                              | 160                                              | 160                                              | 80                                               | 1,280                                               | 1,280                                               | 640                                                      | 1,280                                                     | 160                                                | 160                                                |
| A(H3N2)/swine/Iowa/A01480656/2014     | Cluster IV-A            | 40                              | 40                                  | 160                                              | 80                                               | 160                                              | 40                                               | 160                                                 | 320                                                 | 320                                                      | 320                                                       | 640                                                | 1,280                                              |
| A(H3N2)/swine/Mexico/AVX26/2012       |                         | <10                             | 10                                  | 80                                               | 20                                               | 320                                              | 320                                              | –                                                   | –                                                   | 640                                                      | 640                                                       | 40                                                 | 20                                                 |
| A(H3N2)/swine/Mexico/AVX36/2012       |                         | 10                              | 40                                  | 160                                              | 80                                               | 1,280                                            | 640                                              | –                                                   | –                                                   | 320                                                      | 320                                                       | 40                                                 | 20                                                 |
| A(H3N2)/swine/Mexico/AVX53/2012       |                         | <10                             | 10                                  | 40                                               | 20                                               | 40                                               | 20                                               | –                                                   | –                                                   | 40                                                       | 80                                                        | 20                                                 | 20                                                 |
| A(H3N2)/swine/Mexico/AVX57/2012       |                         | 10                              | 20                                  | 160                                              | 40                                               | 320                                              | 80                                               | –                                                   | –                                                   | 160                                                      | 160                                                       | 20                                                 | <10                                                |
| A(H3N2)/swine/Mexico/985778/2013      |                         | 40                              | 80                                  | 80                                               | 80                                               | –                                                | –                                                | 40                                                  | 40                                                  | 20                                                       | 20                                                        | <10                                                | <10                                                |
| A(H3N2)/swine/Mexico/84706352130/2015 |                         | 20                              | 80                                  | 80                                               | 80                                               | –                                                | –                                                | 40                                                  | 20                                                  | 10                                                       | 20                                                        | <10                                                | <10                                                |
| A(H3N2)/swine/Mexico/8630565/2011     |                         | 20                              | 20                                  | 80                                               | 40                                               | –                                                | –                                                | 1,280                                               | 1,280                                               | 160                                                      | 80                                                        | 20                                                 | <10                                                |
| A(H3N2)/swine/Mexico/8630459/2011     |                         | 40                              | 80                                  | 160                                              | 80                                               | –                                                | –                                                | 2,560                                               | 2,560                                               | 160                                                      | 160                                                       | 40                                                 | 10                                                 |
| A(H3N2)/swine/Mexico/AVX15/2012       |                         | 20                              | 20                                  | <10                                              | 10                                               | 40                                               | 20                                               | –                                                   | –                                                   | 320                                                      | 160                                                       | <10                                                | <10                                                |
| A(H3N2)/swine/Mexico/9890611/2013     |                         | 40                              | 80                                  | 160                                              | 640                                              | –                                                | –                                                | 1,280                                               | 640                                                 | 160                                                      | 80                                                        | 10                                                 | <10                                                |

\*–, not tested.

## Reference

1. Mena I, Nelson MI, Quezada-Monroy F, Dutta J, Cortes-Fernández R, Lara-Puente JH, et al. Origins of the 2009 H1N1 influenza pandemic in swine in Mexico. *eLife*. 2016;5:e16777. [PubMed](#)  
<http://dx.doi.org/10.7554/eLife.16777>

PB2 TRIG

- location
- Asia
  - Mexico (CN,E,W)
  - Mexico (SE)
  - Mexico (NW)
  - USA and Canada

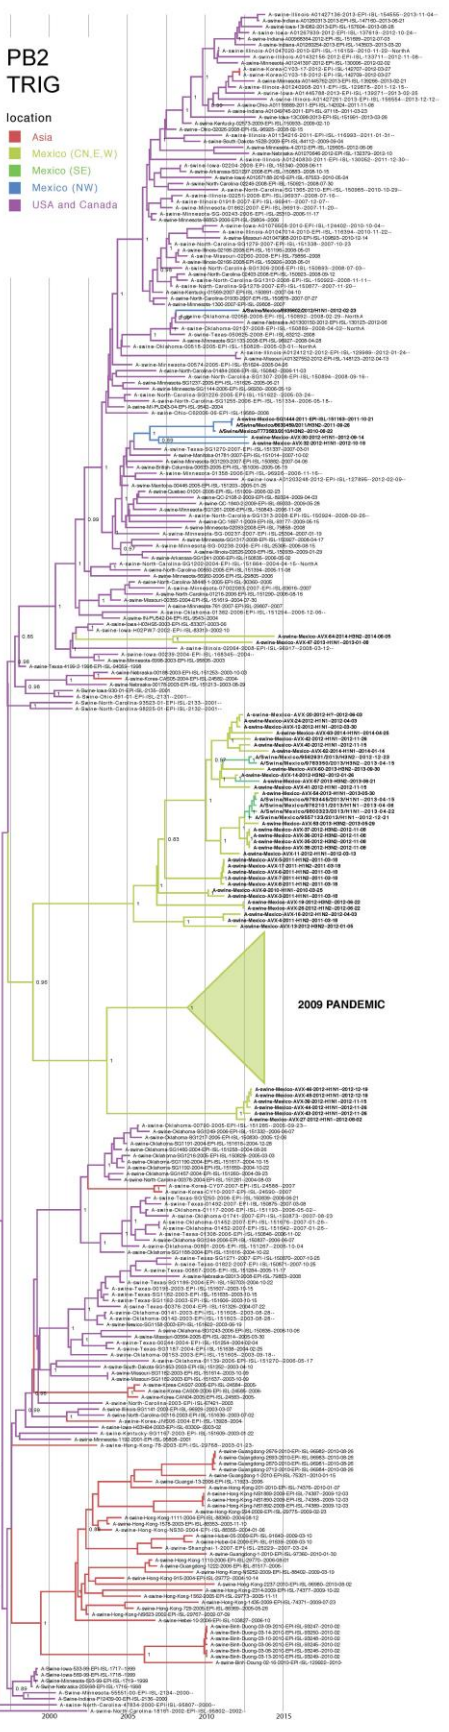

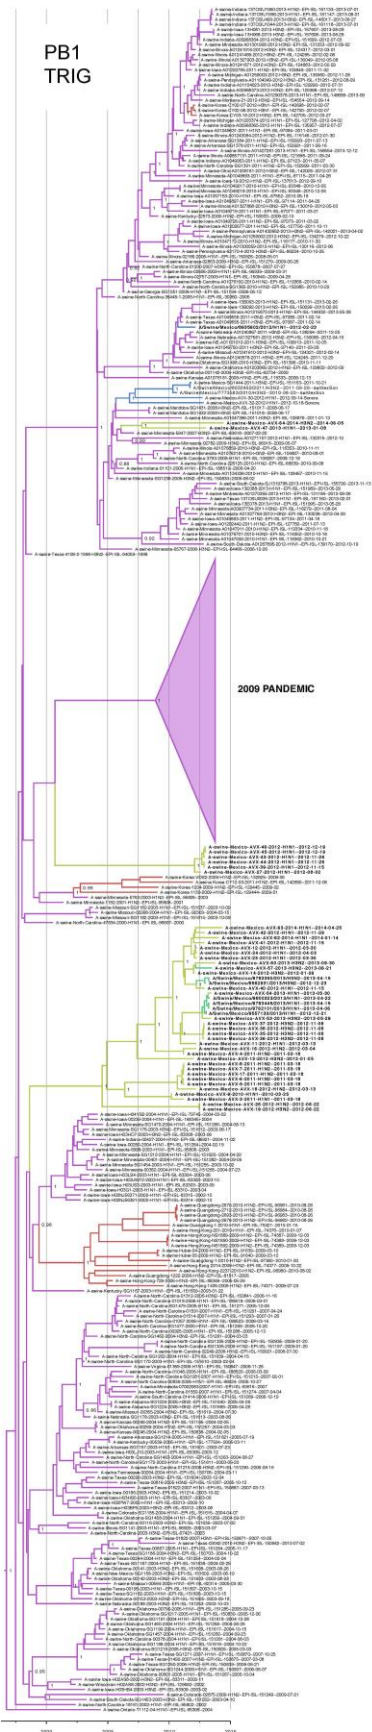

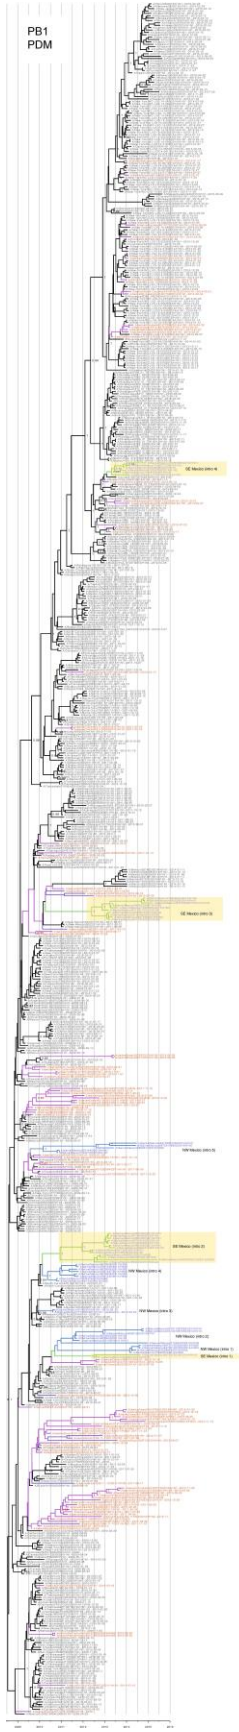



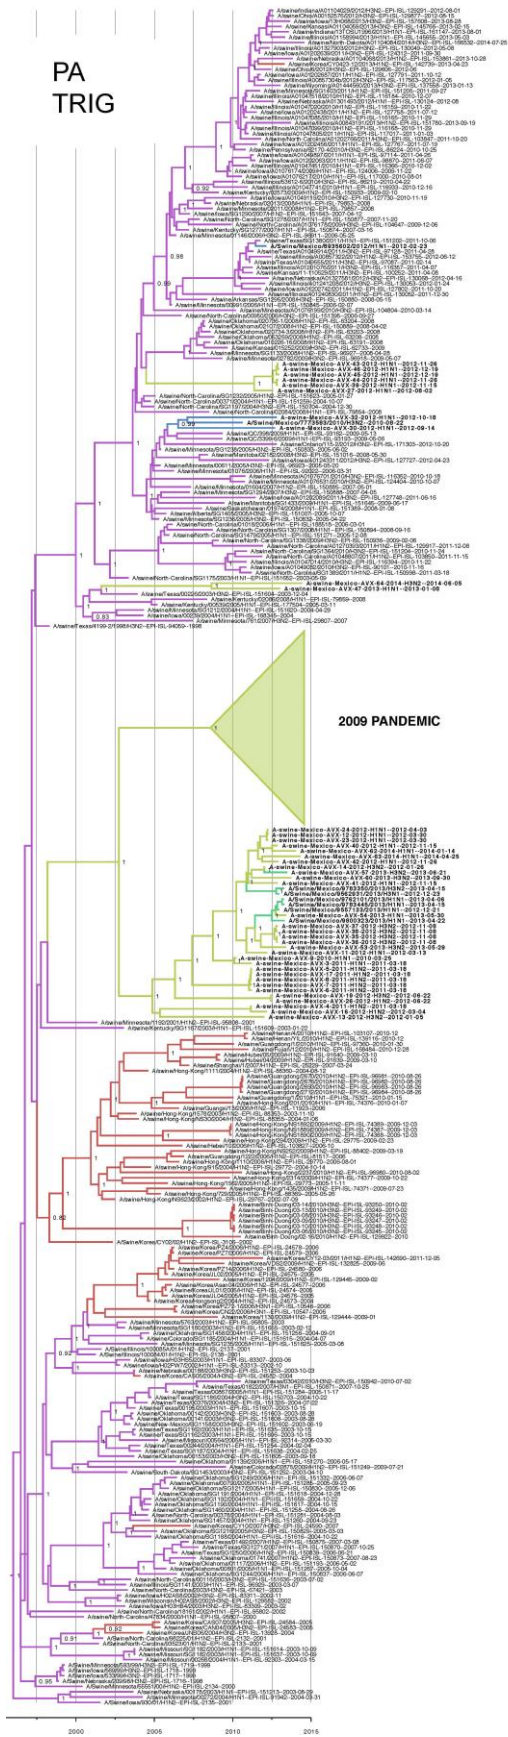

PA TRIG

2009 PANDEMIC

H1  
CswH1N1

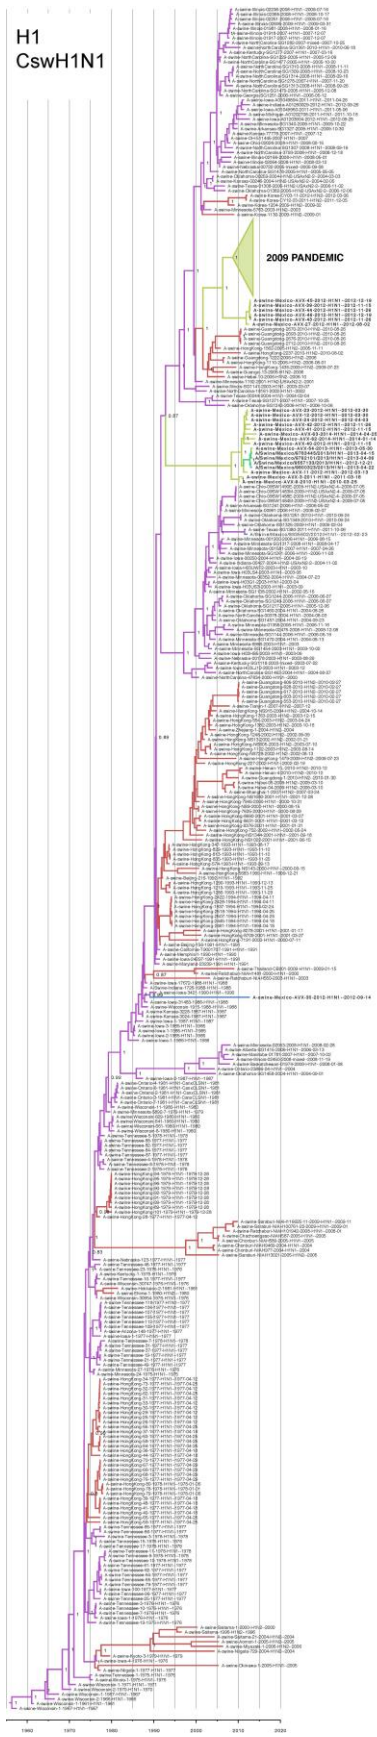

H3

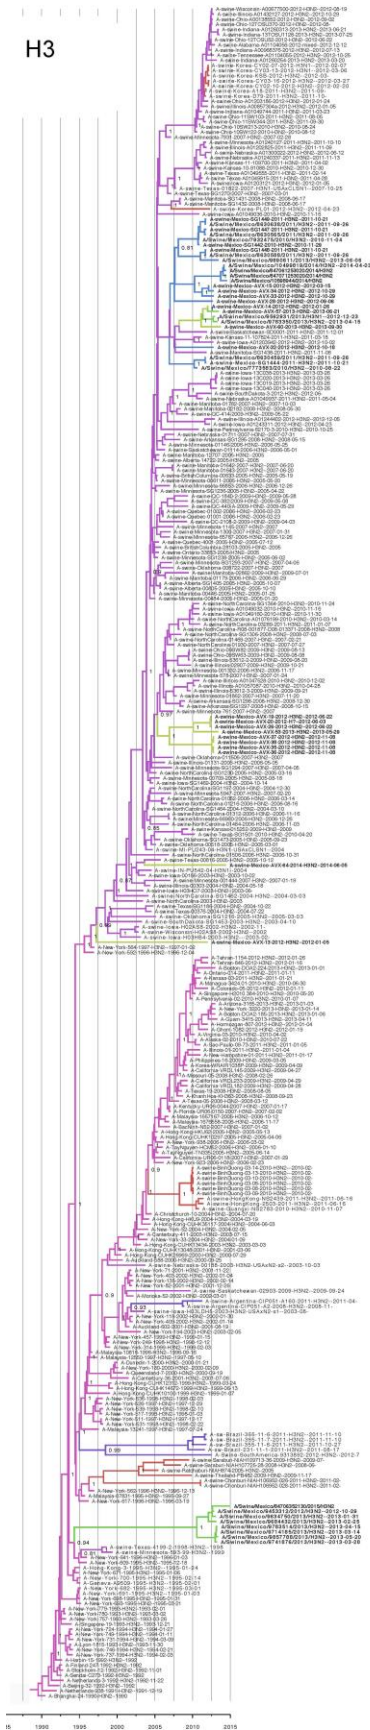

NP TRIG

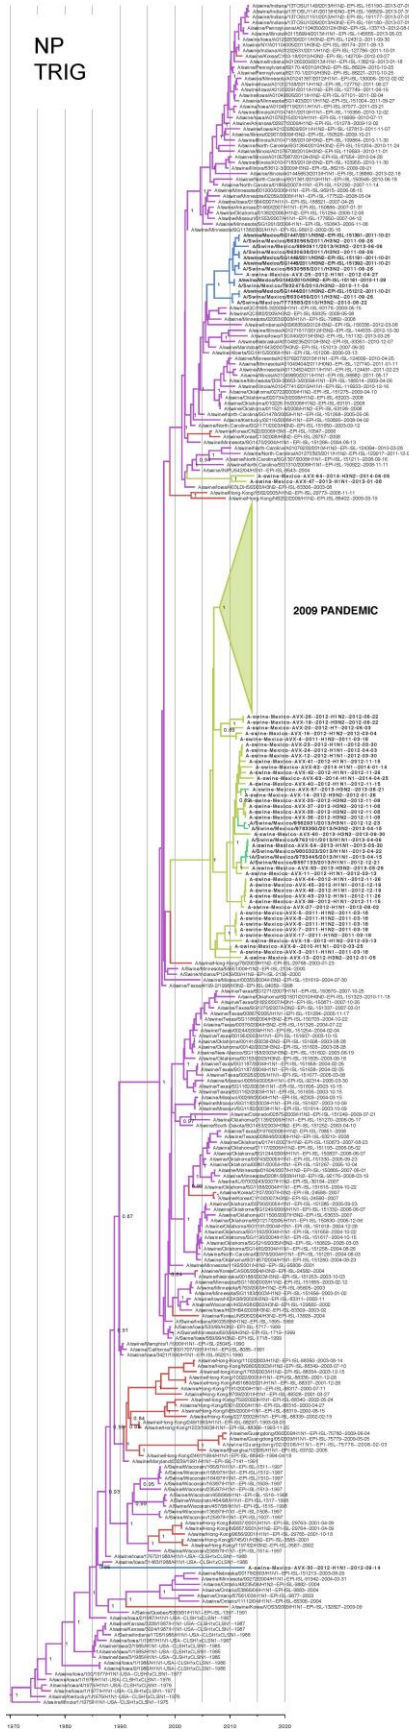

2009 PANDEMIC

N1  
CswH1N1

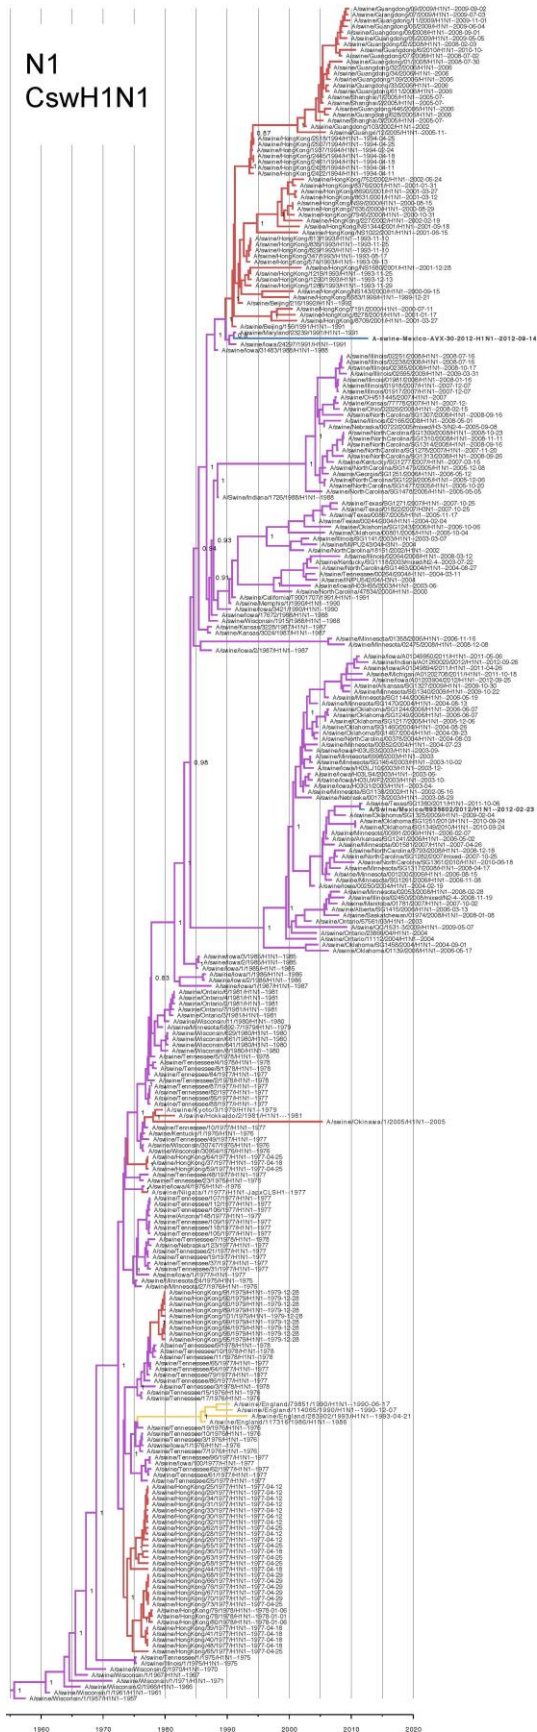



N1  
EAswH1N1

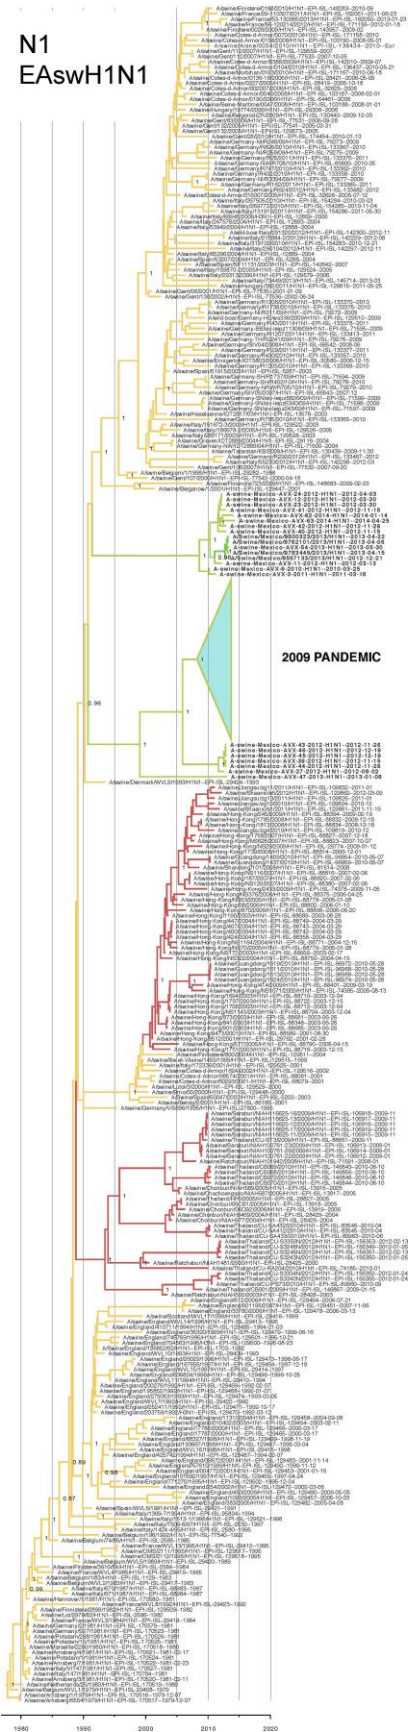

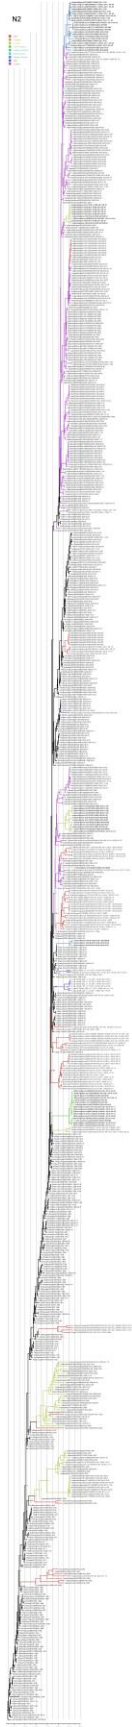

MP  
CswH1N1

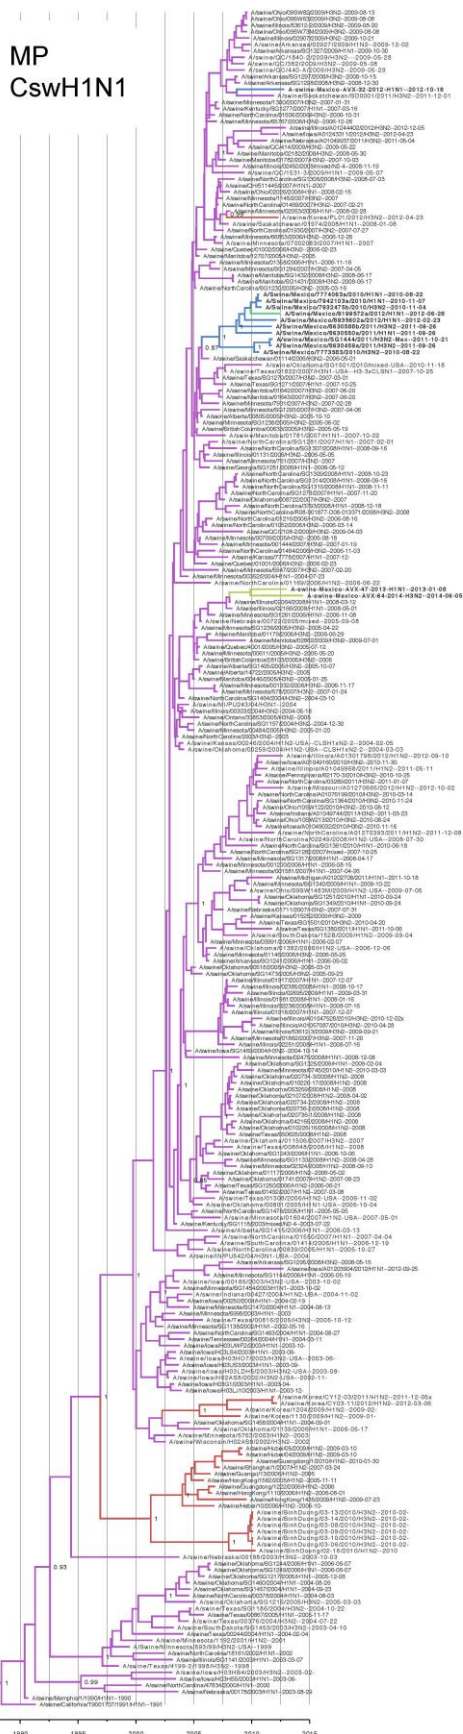



MP  
EAswH1N1

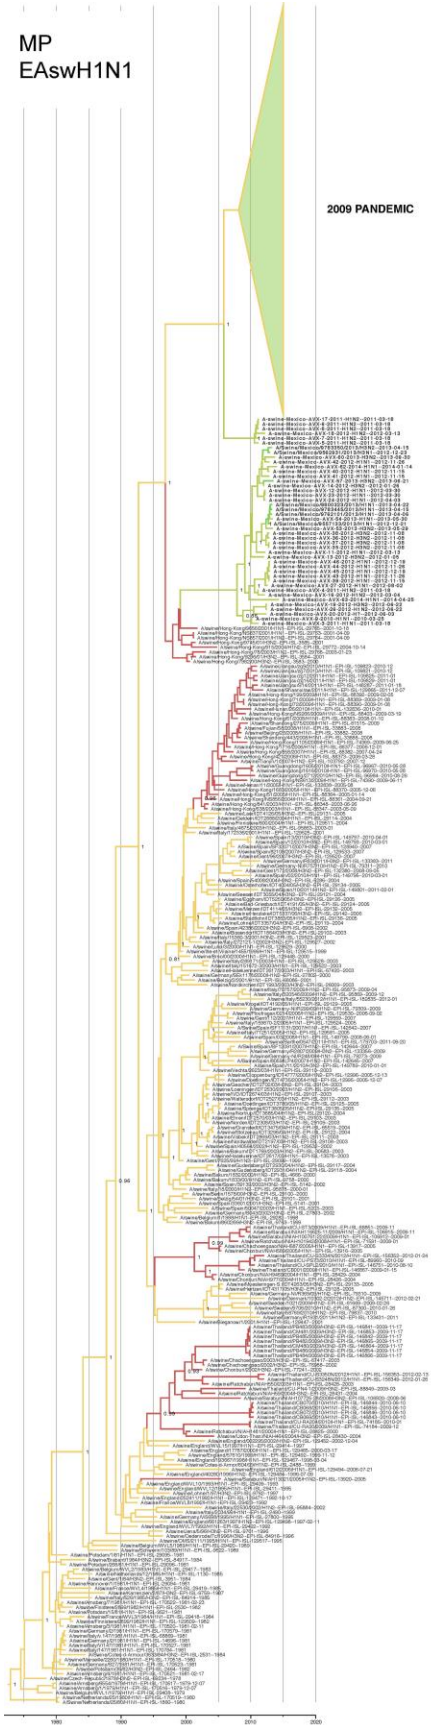

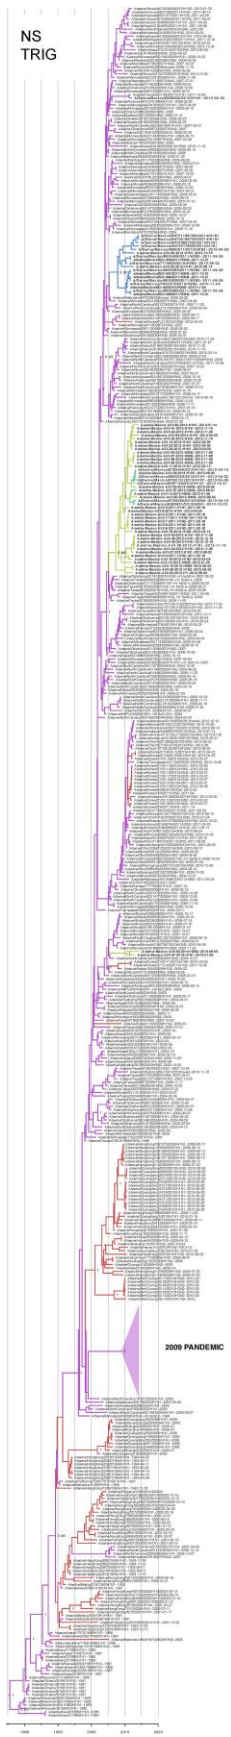

**Appendix Figure.** Maximum clade credibility (MCC) trees inferred separately for each segment of invasive influenza virus genomes and lineages, Mexico. Time-scaled Bayesian MCC trees inferred for 13-nt alignments; PB2 (TRIG), PB1 (pdm), PB1 (TRIG), PA (TRIG), H1 (C), H3 (TR) + H3 (Hu), NP (TRIG), N1 (C), N1 (EA), N2 (TR) + N2 (Hu), MPe, MP (TRIG), and NS (TRIG). Color of each branch indicates the most probable location state. Tip labels and posterior probabilities for key nodes are provided. Numbers along branches are bootstrap values. Bold indicates strains isolated in this study. intro, introduction; H, hemagglutinin; Hu, human; MP, matrix protein; N, neuraminidase; NP, nucleoprotein; NS, nonstructural; PA, polymerase acidic; PB, polymerase basic.
